# Supplementary material
Source: PubMed Central journal article supplement (PMC5820164)

Figure 1.

- More than three (3) prescribers within 12 months
- More than four (4) controlled substance II-V prescriptions within 12 months
- More than two (2) controlled substance II-V prescriptions within last 40 days
- Any prescription for Methadone, Suboxone, fentanyl transdermal, long acting morphine, or long acting oxycodone within last 6 months
- Any overlapping prescriptions for narcotics (controlled substance II-V) and benzodiazepines within last 6 months
- More than 100 average MED/day prescribed within last 40 days

Figure E1.

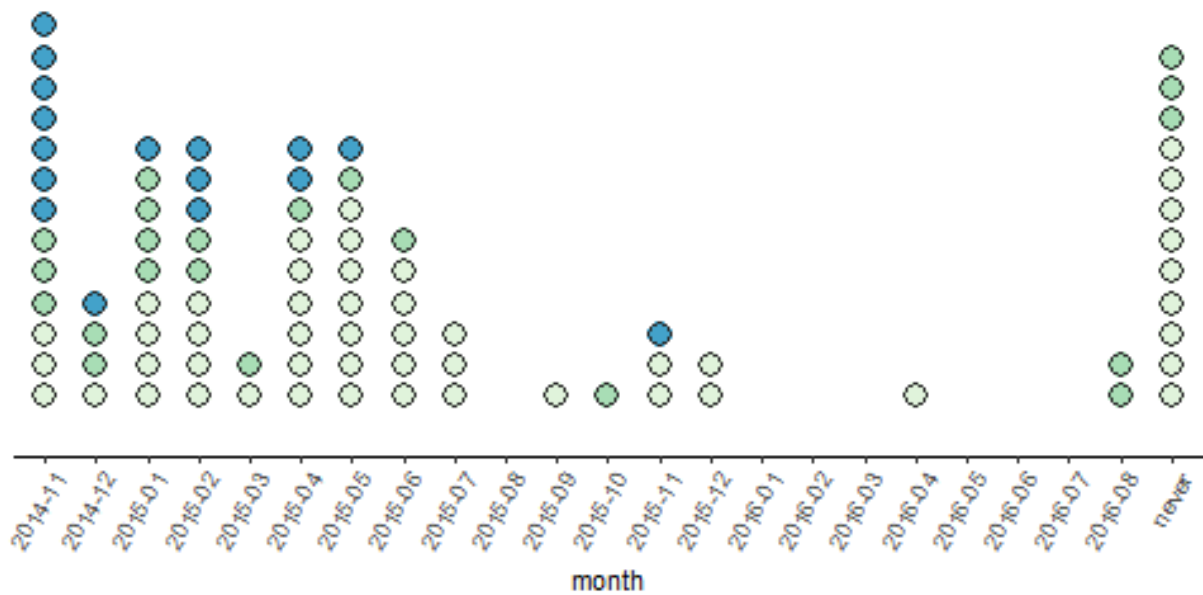

Figure E2.

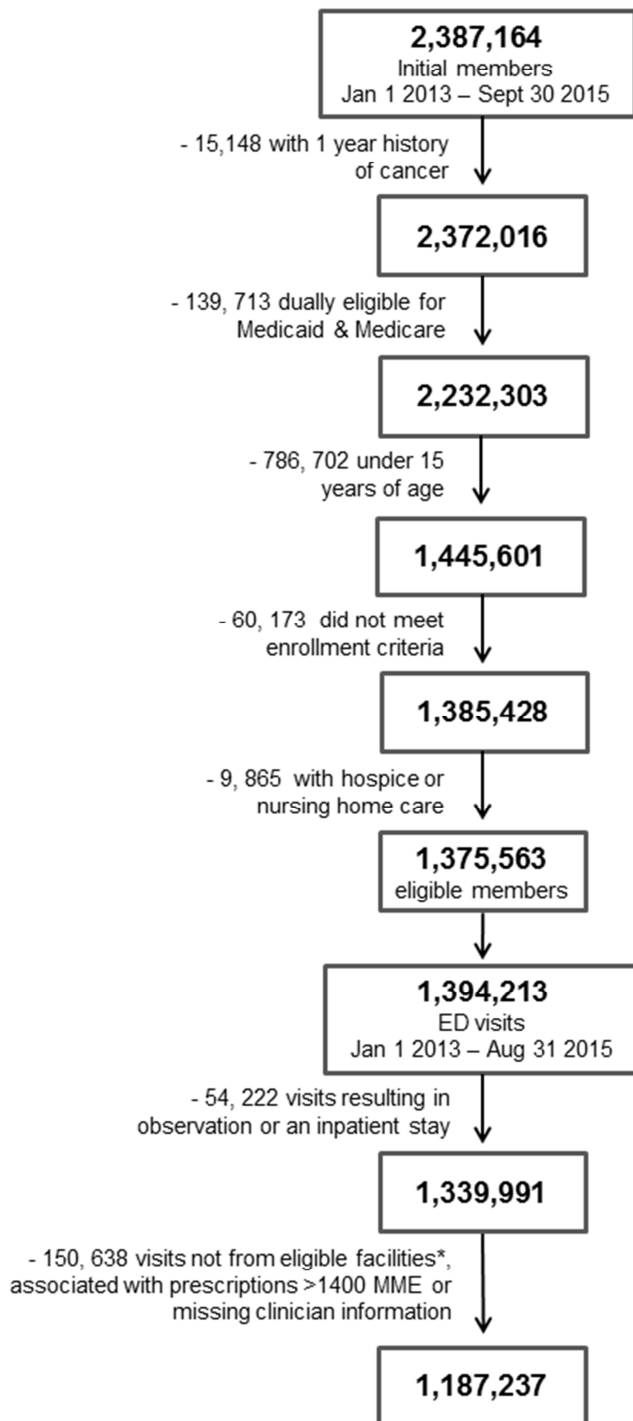

Figure E3.

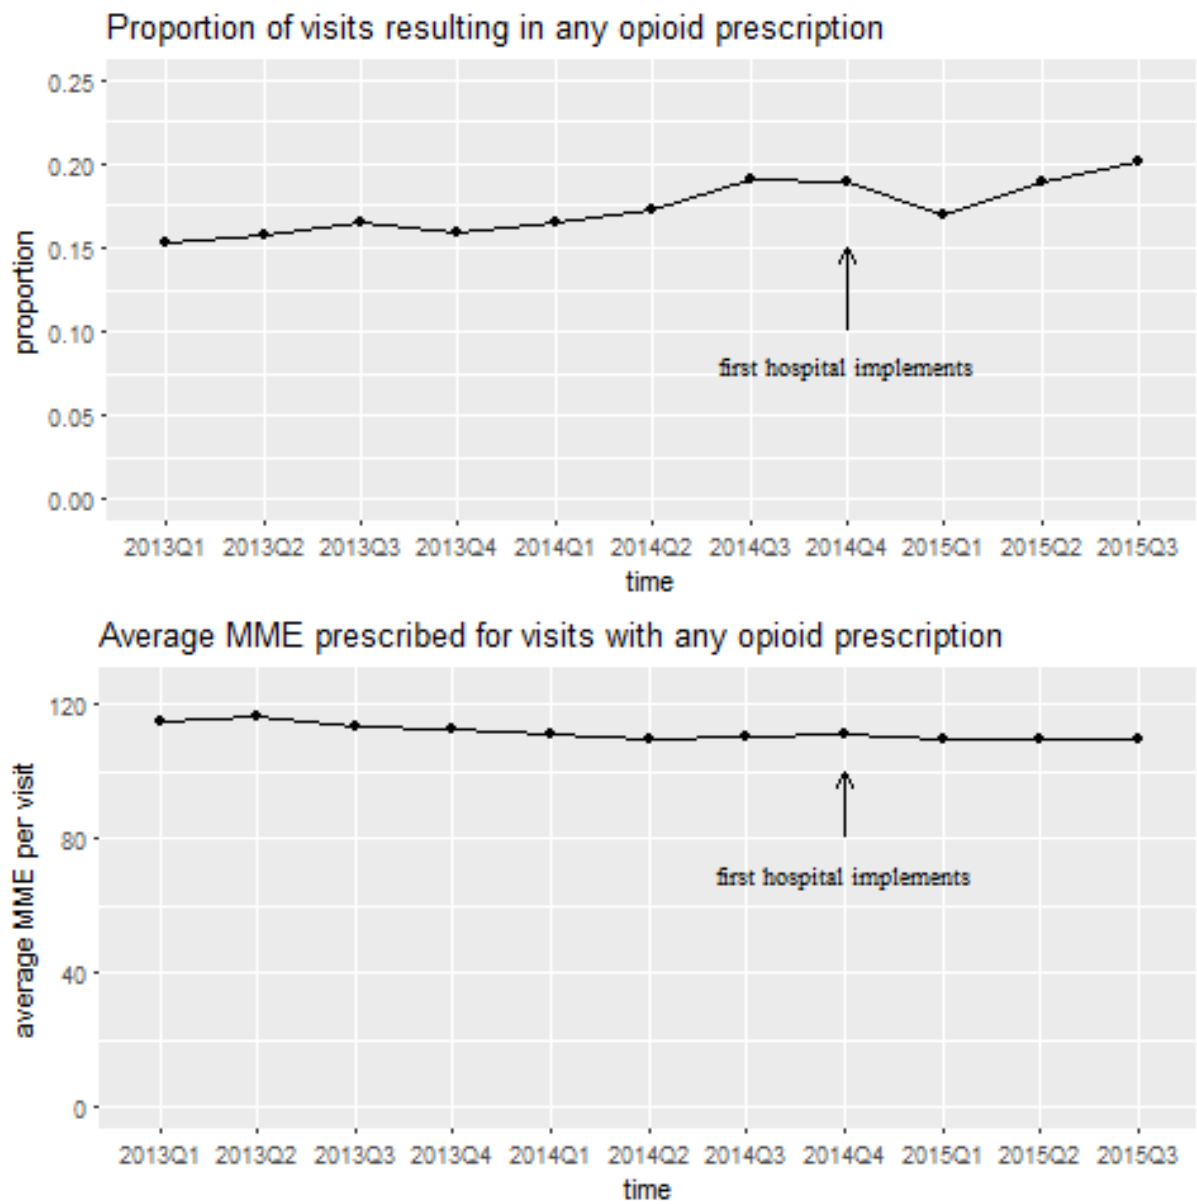

Supplement: NIHMS927601-supplement-supplement_1.pdf [file NIHMS927601-supplement-supplement_1.pdf]
